# Supplementary material
Source: bioRxiv or medRxiv preprint supplement (https://www.biorxiv.org/highwire/filestream/84072/field_highwire_adjunct_files/0/270934-1.pdf)

Proportion of people living in each division

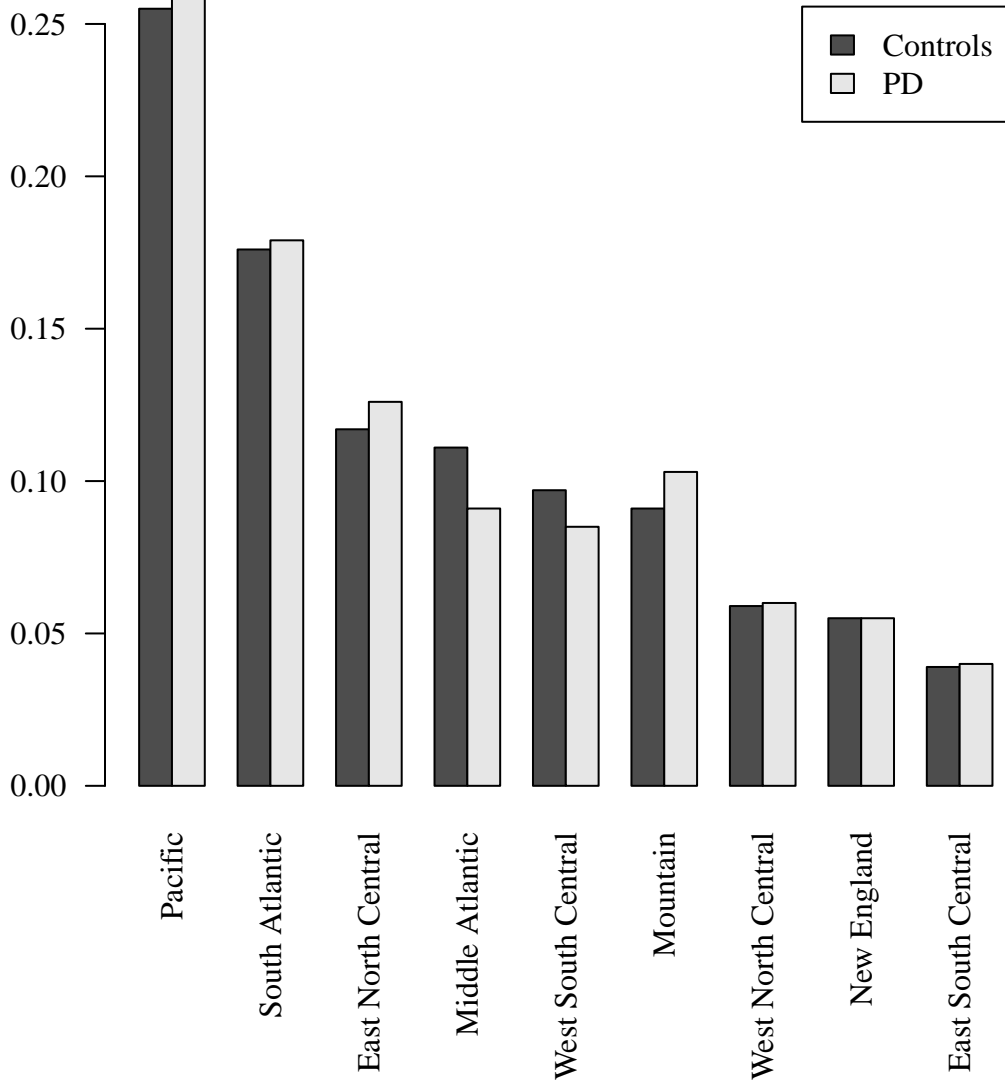

Supplement: Supplementary file [file 270934-1.pdf]
